# Supplementary material
Source: Research Square preprint supplement (doi:10.21203/rs.3.rs-9980755/v1)
Supplement: Supplementary file 1 [file 6368145913a6c87802bbdf69.docx]

**Supplementary Materials**

1. **Magnetic force–field strength relationship of the 2H1S: theoretical derivation**

In the first subsection of Results, we introduced the functional relationship between magnetic force and field strength in the 2H1S. Here, we present the derivation of this relationship (for the translational output case). The key step in the entire derivation is swapping the order of partial differentiation, —that is, moving the partial derivative symbol from outside to inside (Magnetic Co-energy).

According to the principle of virtual displacement,

Where is the spatial position of the magnet. The force on the magnet in the direction of the virtual displacement is the gradient of the magnetic co-energy with respect to, where is the full-space volume integral of the magnetic co-energy density :

where is the spatial coordinate of the integration volume element. can be expressed according to the material type as follows:

|  |  | Eq. (S1) |
| --- | --- | --- |

where is the vacuum permeability, is the permeability of the linear soft magnetic material, and is the permeability of the hard magnet. and are the magnetic field strength and magnetic flux density, respectively, at the spatial coordinate when the magnet is located at spatial position . is the fixed magnetic polarization of the hard magnet. ,,, denote the air domain, the linear soft magnetic material domain, the linear hard magnet material domain, and the nonlinear material domain, respectively.

In the 2H1S model, when the only allowable displacements in the magnetic system are , i.e., , the magnetic co-energy is expanded via a second-order Taylor expansion around the initial position :

Eq. (S2)

Where

Since the magnetic force is continuously differentiable in any direction, the magnetic co-energy has a second-order continuous derivative with respect to , and the differentiation result is independent of the order of differentiation, i.e., . In Eq. (S2), taking further partial derivatives of and incorporating , the relationship between and to is obtained as follows:

Noting that , , we therefore have:

|  |  | Eq. (S3) |
| --- | --- | --- |

In Eq. (S3), , , forms the stiffness matrix, which represents the rate of change of force with respect to displacement.

To express *k* as a function of magnetic field strength **H**, consider a system consisting only of hard magnets and linear soft magnets, where the soft magnet moves only along the direction and the hard magnet moves only along the direction, i.e., ,.

In this case, Eq. (S1) reduces to:

The magnetic co-energy can be expressed as:

Eq. (S4)

where,This is Equation (1) as used in the main text. Next, we take the partial derivative of the magnetic co-energy and swap the order of differentiation to reveal the relationship between magnetic force and **H**.

***Take the first-order partial derivative***

Eq. (S5)

Typically, ,Therefore, is nonzero only on boundary of the soft magnet.

where is the Dirac delta function, is the unit vector in the direction of soft magnet displacement, and is the outward unit normal vector on the surface of the soft magnet, pointing outward. Therefore:

Substituting this into Eq. (S5) yields the first-order partial derivative with respect to as:

Eq. (S6)

***Take the first-order partial derivative***

Unlike partial differentiation with respect to, since the integration domain of the second term in Eq. (S4) is also a function of , we apply the differentiation formula for integrals with variable limits:

=

Therefore, the first-order partial derivative with respect to is:

|  |  | Eq. (S7) |
| --- | --- | --- |

Similar to, is the outward unit normal vector on the surface of the hard magnet, pointing outward.

***Take the second-order partial derivative***

Continue by taking the partial derivative of Eq. (S6) with respect to :

The derivative of the first term in Eq. (S6) is:

Eq. (S8)

The derivative of the second term is:

|  |  | Eq. (S9) |
| --- | --- | --- |

Since the integration domain is a function of , the order of integration and differentiation cannot be directly interchanged. The variable-limit differentiation rule (Leibniz rule for surface integrals with variable limits) is therefore applied in derivative of the third term:

|  |  | Eq. (S10) |
| --- | --- | --- |

Where,,

is the mean curvature at each point on the surface, and is the tangential projection vector of onto the surface. Substituting this into Eq. (S9) yields:

Eq. (S11)

Combining Equations (S8), (S9), and (S11) yields:

According to the fundamental equations of the magnetic field, we have，Moreover, is the projection of the surface gradient onto the normal direction, which is strictly zero. Therefore, the exact solution is:

Eq. (S12)

Engineering approximation for the 2H1S model:

1. represents the rate of change of the surface normal projection in the direction as the soft magnet moves. Since the soft magnet is set to move only in the direction, it undergoes rigid displacement without any deformation; therefore, this term is 0.
2. is the surface divergence of the tangential velocity field, and is the tangential projection of onto the surface. When the surface is the lateral surface of a cylindrical soft magnet, this projection is 0; when the surface is the top or bottom surface of the cylindrical soft magnet, this projection is constant, so its divergence is 0.

Therefore, the engineering approximation result for the 2H1S model is:

Stiffness matrix coefficients of the 2H1S model after engineering approximation:

Eq. (S13)

***Take the second-order partial derivative***

Taking the partial derivative of Eq. (S7) with respect to, using the same method as for the second-order derivative with respect to, yields:

Engineering approximation for the 2H1S model:

1. is the rate of change of the projection of the surface normal vector onto the direction with respect to . For a hard magnet undergoing only rigid translation in the direction, this value is clearly 0.
2. is the surface divergence of the tangential velocity field, and is the tangential projection of onto the surface. When the surface is the lateral surface of a cylindrical hard magnet, this projection is constant; when the surface is the top or bottom surface of the cylindrical hard magnet, this projection is 0. Therefore, its divergence is 0.
3. In , is the mean curvature, which is zero on a plane. For a cylindrical hard magnet, is nonzero only on the lateral surface, while is zero on the lateral surface and nonzero only on the top and bottom surfaces. Therefore, this term is identically zero for a cylindrical hard magnet. It should be noted that when taking the second-order partial derivative with respect to , in Eq. (S12) cannot be neglected, because the motion direction of the soft magnet is not orthogonal to the lateral surface normal vector.
4. is the projection of the surface gradient onto the normal direction, which is strictly 0.

Therefore, the engineering approximation result for the 2H1S model is:

Stiffness matrix coefficients of the 2H1S model after engineering approximation:

Eq. (S14)

***Take the mixed partial derivative***

Similar to the derivation process of Eq. (S6), using , we take the partial derivative of Eq. (S6) with respect to:

According to the fundamental equations of the magnetic field,

Therefore, is given by:

The mixed partial derivative is sufficiently simple, so no engineering approximation is needed for the 2H1S model. The stiffness matrix coefficient

is given by:

Eq. (S15)

***Summary of this derivatio*n**

In summary, for the 2H1S model, under the assumptions that it has only two degrees of freedom (the hard magnet moves along and the soft magnet moves along ), the soft magnet is not saturated, and the polarization of the hard magnet is fixed, the relationship between the magnetic force and the magnetic field **H** when the spatial arrangement of the magnets is given by:

When , i.e., ,we have:

The stiffness matrix represents the rate of change of magnetic force with respect to displacement and is an important metric for designing the 2H1S model.

In the case of 2H1S translational output mentioned in the main text, they can be written as functions of **H**:

where is the unit vector in the direction of soft magnet displacement, and is the unit vector in the direction of hard magnet displacement.

is the outward unit normal vector on the surface of the soft magnet, pointing outward from the soft magnet.

is the outward unit normal vector on the surface of the hard magnet, pointing outward from the hard magnet.

is the vacuum permeability, is the permeability of the linear soft magnetic material, and is the permeability of the hard magnet.

is the fixed magnetic polarization of the hard magnet. In this example, . the hard magnet is axially magnetized.

, , represent the air domain, the linear soft magnetic material domain, and the hard magnet material domain, respectively. is the boundary of the soft magnet, which depends only on the soft magnet position .

is the boundary of the hard magnet, which depends only on the hard magnet position .

is the mean curvature at each point on the surface. For cylindrical hard magnets and soft magnets in the configuration of 2H1S, it appears only in the derivation result of .

1. **The determination of stiffness coefficients**  **and**


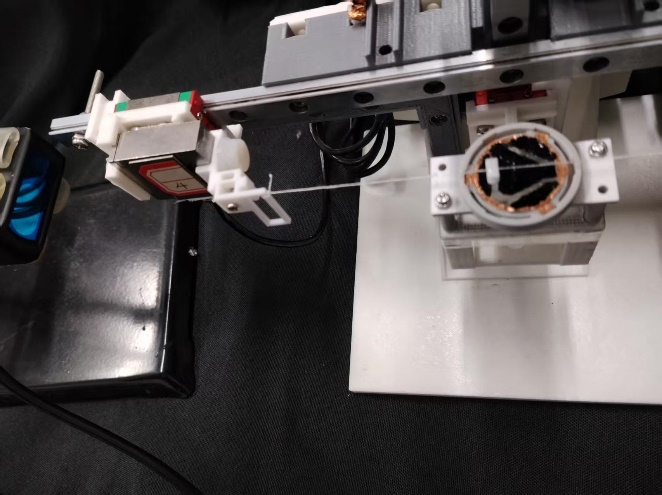


Force sensor

Laser sensor

DEA

**a**


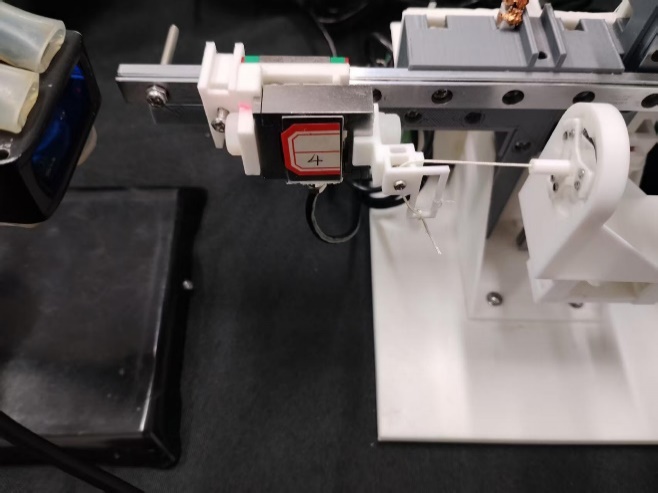


Flexible framework containing PDMS

**b**


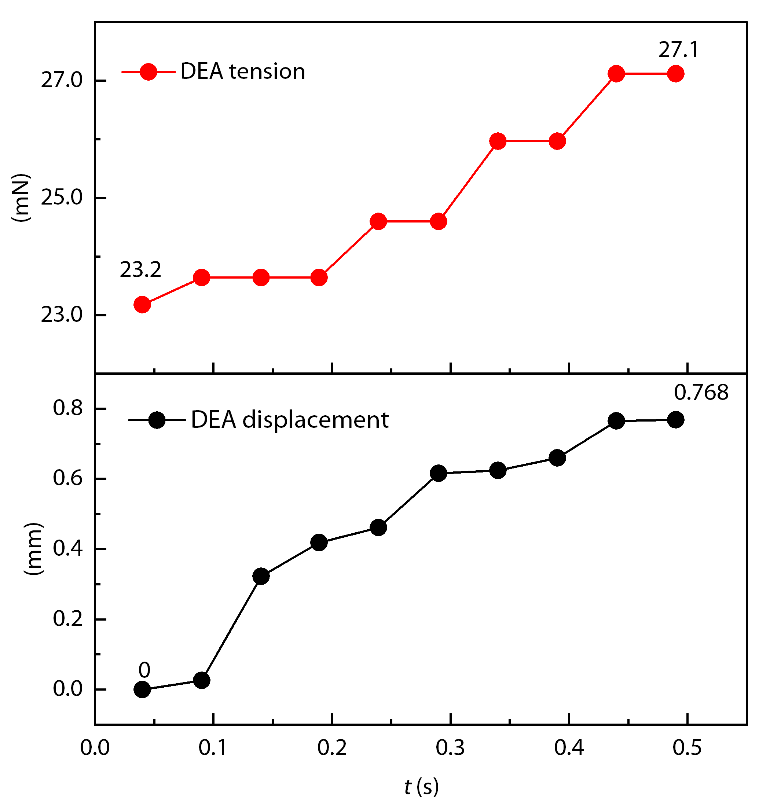

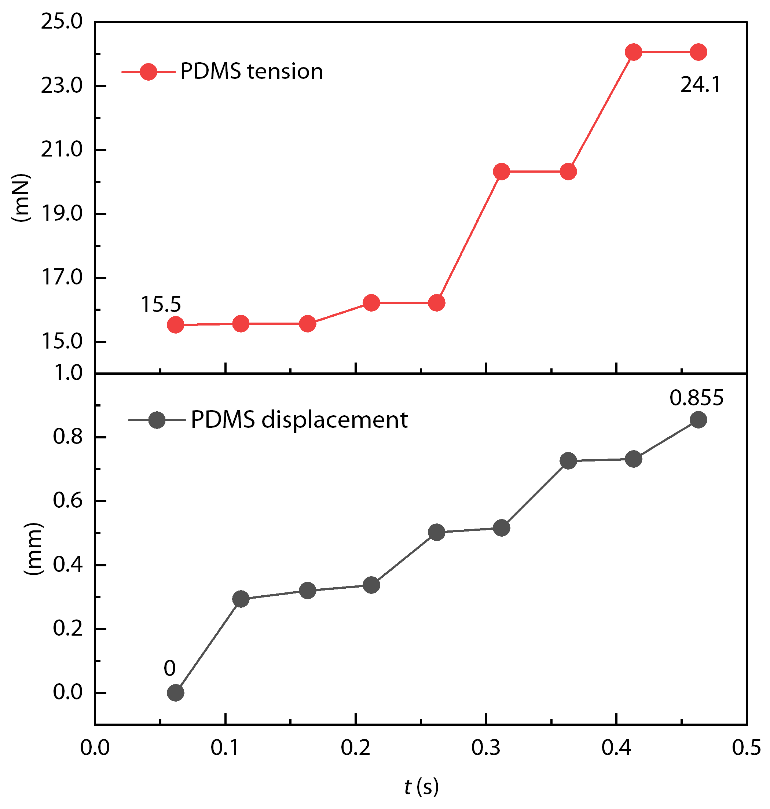


**c d**

**Fig. S1. Measurement and determination of the flexible frame reaction forces provided by the DEA and PDMS to the 2H1S. a** Measurement of the stiffness coefficient of a DEA edge coating that drives the soft magnet. **b** Measurement of the stiffness coefficient of the flexible frame, which is designed by us and determined by PDMS. **c** Curves of DEA reaction force and surface displacement over time recorded by the sensor. **d** Curves of the flexible framework (containing PDMS) reaction force and displacement over time recorded by the sensor.

Figure S1a and S1b show the stiffness measurement setups for the DEA edge coating and the flexible frame, respectively. In both measurements, the force sensor (Cheng Yin, custom-designed with a range of 300 mN and an accuracy of 0.01 mN) was pulled at a constant speed while the steady-state tensile force was recorded, and a laser displacement sensor (MOTEE MS-LC030RS with an accuracy of 0.03mm) simultaneously recorded the real-time displacement change. Combining these two measurements yields the real-time dynamic stiffness curve. This measurement was performed only to roughly estimate the simulation results in order to select a suitable force amplification range. Theoretically, one reaction force is determined by the elasticity of the DEA film (VHB4905), and the other is determined by the stiffness of the flexible frame (PDMS). They should be expressed as:

Since the actuator stroke is small (less than 0.5 mm), they are simplified as constant-stiffness springs. According to the measurement curves of Fig. S1c and Fig. S1d, the linearized stiffness results are calculated as:

With the initial position set to, and following the two boundary conditions of Eq. (2) in the main text, the boundary conditions for the flexible frame reaction force are:

From these, the calculation result of Eq. (3) in the main text is obtained.

1. **Output force measurement methods for the DEA and the DEA+2H1S**


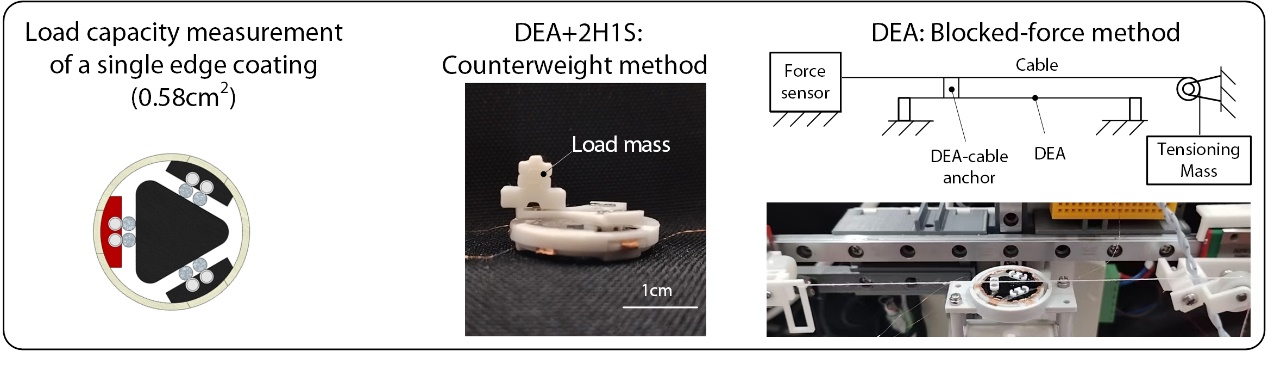


**Fig. S2.** **Output force measurement methods for the DEA and the DEA+2H1S.**

Figure S2 (left) shows the location where the force is to be measured. It is driven by a single edge coating area of 0.58 cm2. The measurement procedure is as follows: First, the DEA and the 2H1S are assembled to form the magneto-electric actuator (DEA+2H1S), as shown in Fig. S2 middle. A series of counterweight masses (0.066g 0.1g 0.13g 0.166g,0.2g,0.25g,0.28g,0.33g,0.38g,0.42g,0.46g,0.5g,0.57g) are then added to one side of the flexible joint. A square wave voltage with a period of T = 10 s was applied, and its amplitude was slowly increased until the mass was just barely lifted. The corresponding driving voltage was then recorded for each mass (12 consecutive measurements per mass were taken and processed with shift‑averaging filtering). Then, the 2H1S was removed, and the output force of the DEA's edge coating on the same side was measured using a force sensor combined with a cable method (Fig. S2 right). The recorded series of V voltages were applied, and the steady-state values of the force sensor were measured as the output force of the DEA body at that edge coating. The same shift-averaging filtering over 12 square wave cycles was applied.

The advantage of this arrangement is that the flexible joint needs to be disassembled only once, allowing both DEA and 2H1S to be measured in a short time without damaging the elastomer membrane itself. All force measurements were completed within two hours to minimize the effects of temporal drift in the sensor and the DEA. The masses of the counterweights were calibrated using the same strain gauge sensor, with a common accuracy of 0.01 mN.

1. **the voltage and microcurrent measurement system**


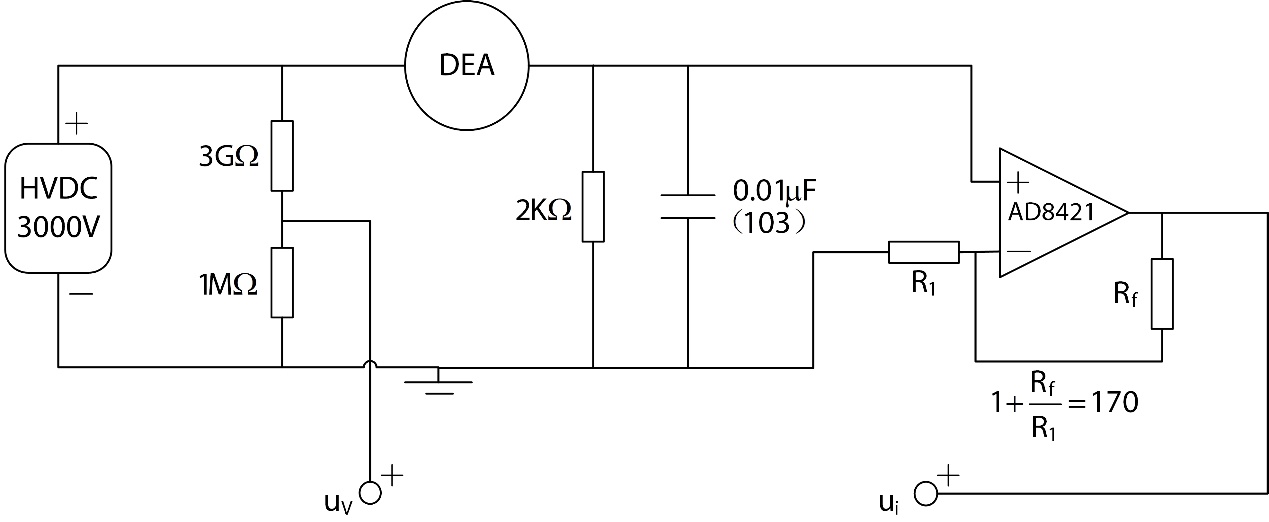


**Fig. S3.** **Design of the voltage and microcurrent measurement circuit.**

Figure S3 shows the circuit design for voltage and microcurrent detection during DEA driving by a high‑voltage DC power supply. In general, voltage is measured using a resistor connected in parallel, and current is measured by measuring the voltage drop across a series-connected resistor (shunt resistor).

For voltage measurement, a resistor (3 GΩ) much larger than the DEA's internal resistance (approximately MΩ level) is connected in parallel. The voltage is scaled down using a voltage divider before being fed into the ADC of a microcontroller for measurement. The ADC sampling frequency is approximately 500 Hz, with a 10‑bit resolution and a 5 V input range.

For current measurement, a resistor (2 kΩ) much smaller than the DEA's internal resistance is connected in series, with a 103capacitor connected in parallel to form an RC filter with a cutoff frequency of approximately 8000 Hz. Experimental results show that this filter effectively preserves the step response shape of the current while filtering out noise. The signal is then conditioned to the volt level by a high-speed operational amplifier (AD8421) with a gain of 170, and then is sent to the ADC input of the microcontroller for current measurement. The ADC sampling frequency is approximately 500 Hz, with a 10‑bit resolution and a 1.1 V input range. The conversion formula from the raw ADC reading to the current in microamperes is:

In addition, since the current is at the nA level and is highly susceptible to electromagnetic interference, all relevant wires are twisted in a double‑spiral configuration (even a single wire is replaced by two spirally twisted wires with their ends connected to each other). Impedance‑matched wires are used for the input and output of the operational amplifier. During measurement, a clean electromagnetic environment is maintained as much as possible.

***Measurement performance***

Voltage measurement resolution: 2.93 V.

Current measurement resolution: 0.00316 μA. With 12 repeated measurements averaged, the standard uncertainty is 0.00025, and the final resolution is rounded to 0.0001 μA (0.1 nA).

Current offset: 0.8483 μA, used to measure the reverse current during discharge.

To preserve the high‑frequency spike regions of the current signal, the cutoff frequency of the measurement system was increased, which resulted in larger high‑frequency noise in the high‑voltage and low‑voltage steady‑state regions. The only filtering method at the software level is shift‑averaging after 12 repeated measurements. At the hardware level, the only filtering is an RC circuit that suppresses high‑frequency noise without affecting the peak amplitudes of the spikes. We have retained these raw measurement data as they are to restore the true voltage‑current characteristics as faithfully as possible.

1. **Simulated active stiffness tuning capability of the 2H1S**


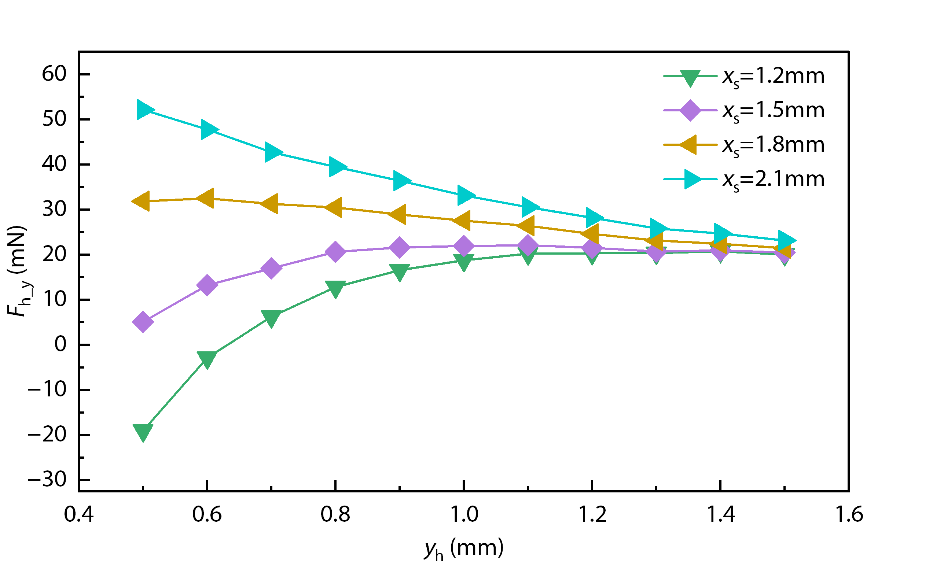


**Fig. S4.** **Based on the translational output configuration of 2H1S, the curve of the H output magnetic force versus output displacement with respect to the S position is presented.**

Figure S4 shows the output magnetic force versus output displacementof the 2H1S translational model (from Fig. 8a in the main text) for different iron piece positions. By actively adjusting the position of S (the iron piece), the output force of the 2H1S hard magnet versus output displacement can be continuously tuned, demonstrating actively controllable stiffness characteristics. This allows integration with different flexible frames to achieve various practical output stiffness curves. Since this paper focuses more on demonstrating the passive variable stiffness capability in Example C, this active stiffness tuning feature is not the main focus of this study and is only briefly introduced in simulation.

1. **The assembly of the magneto-electric actuator in Example A**

Figure 2d shows the assembly process of the magneto-electric actuator. Six 2H1S units are arranged in groups of two to form an isosceles triangle configuration. The upper hard magnets and lower hard magnets are fixed to the upper plate and the lower plate, respectively. The upper plate is connected to the frame of a dielectric elastomer actuator (DEA) through a PDMS membrane (SC200, Hangzhou Guinie), forming a flexible joint with three degrees of freedom (pitch, yaw, and extension). A planar DEA (3M VHB4905) with a 3.3 × 3.3 stretch ratio, fabricated using a standard method, is placed between the upper and lower plates. Graphite conductive grease (JUNE SD-001) used as the material for the surface electrode. The lower plate is fixed to the frame of the DEA. Six iron pieces (circular iron discs, 2 mm in diameter and 0.5 mm in thickness) are attached to the surface of the DEA. To suppress charge concentration caused by the addition of the iron pieces, a low-modulus film (3M 9460PC) is installed between the DEA and the ferromagnetic pieces. This film also serves to cover the carbon coating on the elastomer. The same film is applied to the bottom surface of the DEA. To prevent irreversible attraction of the iron pieces toward the magnets, a 0.2‑mm isolation film (magnet isolation film) is placed on the surface of the magnets.

1. **Implementation steps of redox reaction of iron in Figure 7c**

Electrode materials:

Copper foam (60PPI) and iron foam(60PPI) are used as the two electrodes, respectively. Before the experiment, they should be immersed in a 0.1 M HCl solution for at least 30 minutes. This treatment removes the surface oxide layer and eliminates internal air bubbles, thereby increasing the reaction rate. According to our experiments, sufficient immersion can reduce the reaction time from 2 minutes to 40 seconds.

Electrolyte:

The solution is prepared from 3.25M FeCI2, 2MNH4CI and 0.1M Ascorbic After mixing evenly, HCl is added dropwise to adjust the pH to 1.

Experiment:

The electroplating experiment was conducted at a voltage of 1 V. After approximately 40 seconds, the iron plating layer, under the influence of the magnetic field, caused the copper foam to start moving. The voltage was then reversed to initiate iron dissolution. After five cycles, due to the hydrogen evolution effect, the redox reaction began to generate ferric iron (Fe³⁺), resulting in a gradual weakening of the variable permeability effect.

1. **Simulation dimensions and simulation environment settings**


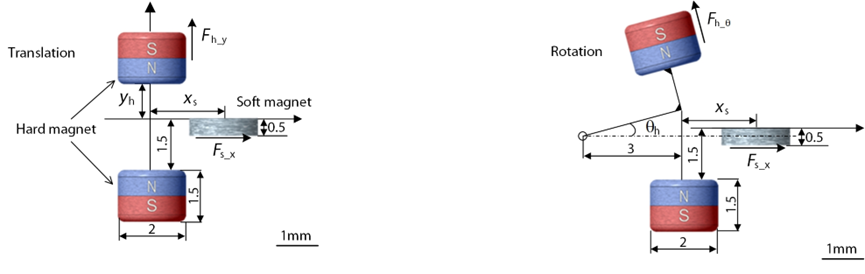

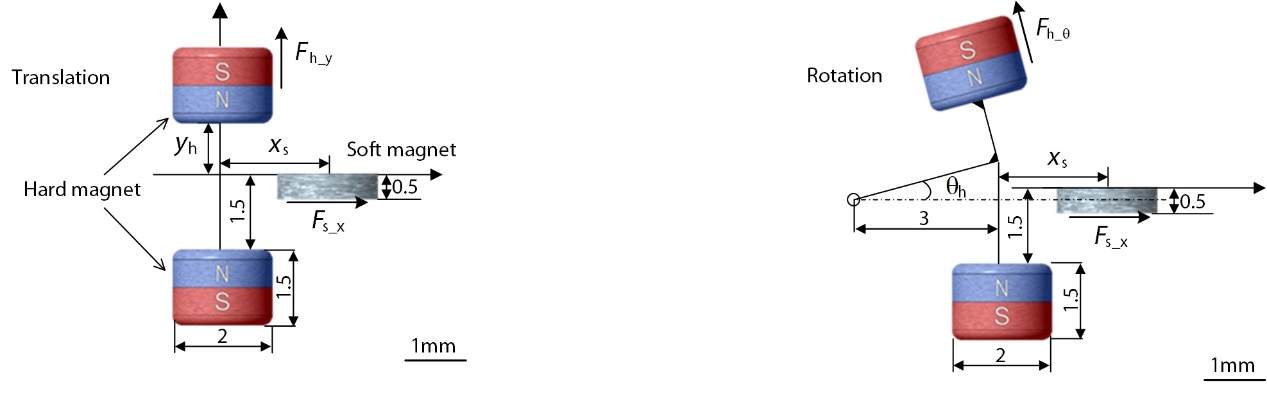


**Fig. S5. Simulation dimensions of the two output motion cases of 2H1S.** Left: case where the lower hard magnet is fixed and the upper hard magnet outputs translation. Right: Case where the lower hard magnet is fixed and the upper hard magnet rotates about a fixed axis

Using COMSOL 6.0 for finite element analysis.

Physics interface: Magnetic Fields, No Currents and Sensitivity.

Materials: Air, N35 (Sintered NdFeB), Soft Iron (Without Losses).

Air domain: a cylindrical region of 100 mm × 100 mm.

Mesh: maximum element size 3.5 mm, minimum element size 0.15 mm, maximum element growth rate 1.35, curvature factor 0.3, narrow region resolution 0.85 (default extra fine setting).

Study: stationary study with parametric sweeps of and for translation, and for rotation.

The magnetic force/torque was calculated through sensitivity analysis of the magnetic energy with respect to displacement/angle. Specifically, in the rotational case, is obtained from the resultant force and torque acting on the upper hard magnet.

1. **Simulation validation of Corollary 3**


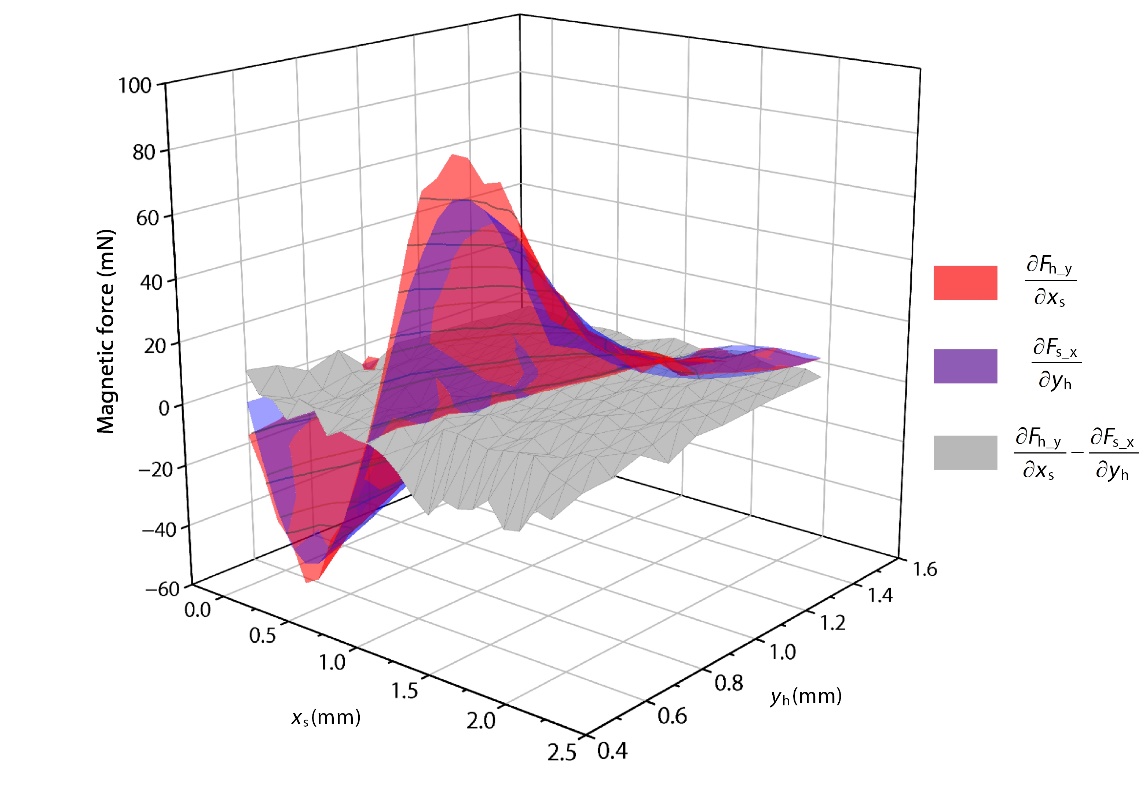


**Fig. S6. Simulation validation of in Corollary 3, using the translational output case of the 2H1S in Fig. 8d as an example.**

Figure S2 shows the surface plots of and , along with their difference. The two surfaces have nearly identical shapes, and the difference surface is near zero plane. The error comes from the step size of the parametric sweep in the finite element analysis. The simulation range is of ,.
